# Supplementary material for: Minimizing Postsampling Degradation of Peptides by a Thermal Benchtop Tissue Stabilization Method
Source: PubMed Central journal article supplement — Biopreserv Biobank. 2016 Apr 1;14(2):172–9. doi: 10.1089/bio.2015.0088 (PMC4834486; doi:10.1089/bio.2015.0088), 2016-04-01
Supplement: Supp_Figure1.pdf [file Supp_Figure1.pdf]

## Supplementary Data

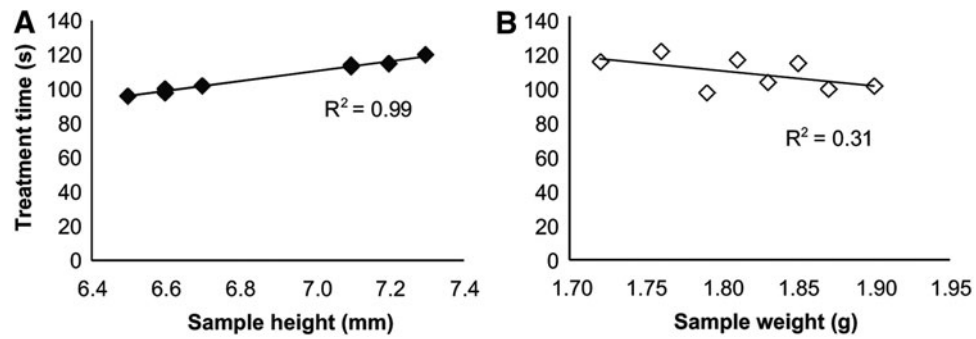

**SUPPLEMENTARY FIG. S1.** The sample height (A) and weight (B) in relation to treatment time in the Stabilizer T1 instrument. The graphs are based on eight individuals and the treatment time, sample height, and weight are expressed as seconds (s), millimeter (mm), and grams (g), respectively.
