# Supplementary material for: Minimizing Postsampling Degradation of Peptides by a Thermal Benchtop Tissue Stabilization Method
Source: PubMed Central journal article supplement — Biopreserv Biobank. 2016 Apr 1;14(2):172–9. doi: 10.1089/bio.2015.0088 (PMC4834486; doi:10.1089/bio.2015.0088), 2016-04-01
Supplement: Supp_Figure2.pdf [file Supp_Figure2.pdf]

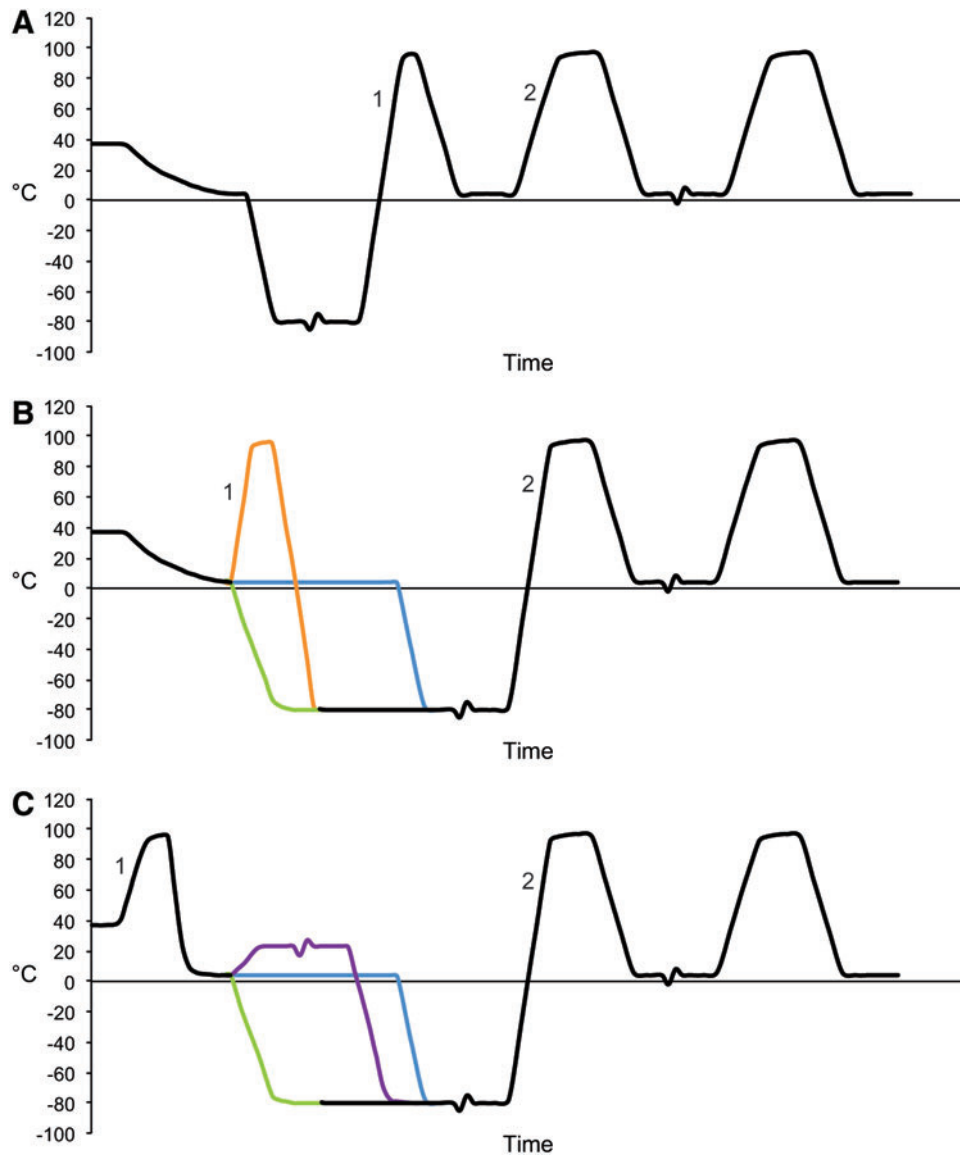

**SUPPLEMENTARY FIG. S2.** Temperature profiles for tissue samples exposed to different postmortem handling procedures. **(A)** Tissue samples from nonstabilized brain were stabilized in the frozen state immediately before extraction. **(B)** Tissue samples from nonstabilized brain were stabilized after dissection (*orange*), kept on wet ice for 15 minutes (*blue*), or frozen directly (*green*). The *black line* represents similar handling. **(C)** Tissue samples from stabilized brain were left in room temperature (20°C) for 2 hours (*purple*), kept on wet ice for 15 minutes (*blue*), or frozen directly (*green*). The *black line* represents similar handling. The time scale is not fully representative. A disruption of the *line* represents longer storage at the same temperature. 1, tissue stabilization; 2, start of the extraction with repeated heating at 95°C.
