# Supplementary material for: Minimizing Postsampling Degradation of Peptides by a Thermal Benchtop Tissue Stabilization Method
Source: PubMed Central journal article supplement — Biopreserv Biobank. 2016 Apr 1;14(2):172–9. doi: 10.1089/bio.2015.0088 (PMC4834486; doi:10.1089/bio.2015.0088), 2016-04-01
Supplement: Supp_Table1.pdf [file Supp_Table1.pdf]

SUPPLEMENTARY TABLE S1. THE *EX VIVO* TIME UNTIL STABILIZATION AND FREEZING OF TISSUE SAMPLES

| <i>Tissue handling procedure</i>                        | <i>Hypothalamus</i> |               | <i>Striatum</i>  |               | <i>Cingulate cortex</i> |               |
|---------------------------------------------------------|---------------------|---------------|------------------|---------------|-------------------------|---------------|
|                                                         | <i>Stabilize</i>    | <i>Freeze</i> | <i>Stabilize</i> | <i>Freeze</i> | <i>Stabilize</i>        | <i>Freeze</i> |
| Nonstabilized brain                                     |                     |               |                  |               |                         |               |
| Standard procedure, freeze                              |                     | 80 ± 1        |                  | 255 ± 15      |                         | 229 ± 15      |
| Wet ice 15 minutes, freeze                              |                     | 998 ± 7       |                  | 1150 ± 17     |                         | 1124 ± 16     |
| Freeze, stabilize frozen before extraction <sup>a</sup> |                     | 101 ± 11      |                  |               |                         |               |
| Stabilize fresh tissue, freeze                          | 142 ± 3             | 159 ± 7       | 267 ± 16         | 303 ± 26      | 220 ± 25                | 236 ± 9       |
| Stabilized brain                                        |                     |               |                  |               |                         |               |
| Freeze                                                  | 242 ± 7             | 280 ± 12      | 228 ± 6          | 399 ± 15      | 228 ± 6                 | 375 ± 13      |
| Wet ice 15 minutes, freeze                              | 224 ± 6             | 1147 ± 7      |                  |               |                         |               |
| Room temperature 2 hours, freeze                        |                     |               | 241 ± 4          | 7620 ± 20     | 241 ± 4                 | 7594 ± 19     |

The table shows the *ex vivo* time until stabilization and freezing, respectively, of the tissue samples subjected to the different tissue handling procedures according to Figure 1 in the main document. The values represent mean ± SEM and are expressed as seconds.

<sup>a</sup>The tissues were rapidly transferred from storage on dry ice to a Maintainor Tissue card and inserted into the Stabilizer T1.
